# Supplementary material
Source: PubMed Central journal article supplement (PMC2888408)
Supplement: supp_M109.092684_jbc.M109.092684-1.pdf [file supp_M109.092684_jbc.M109.092684-1.pdf]

**Supplemental Information.**

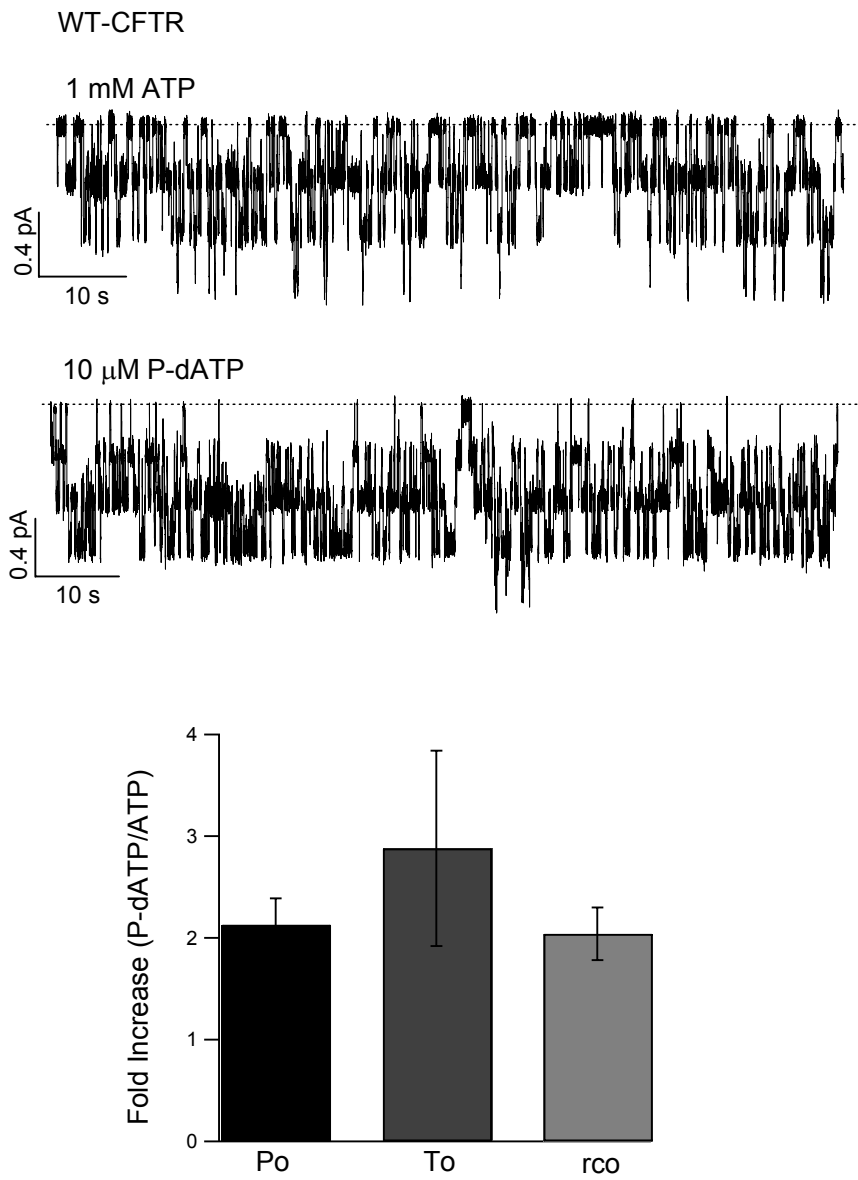

**Figure S1:** Effect of 10  $\mu$ M P-dATP on WT-CFTR gating in an excised patch.

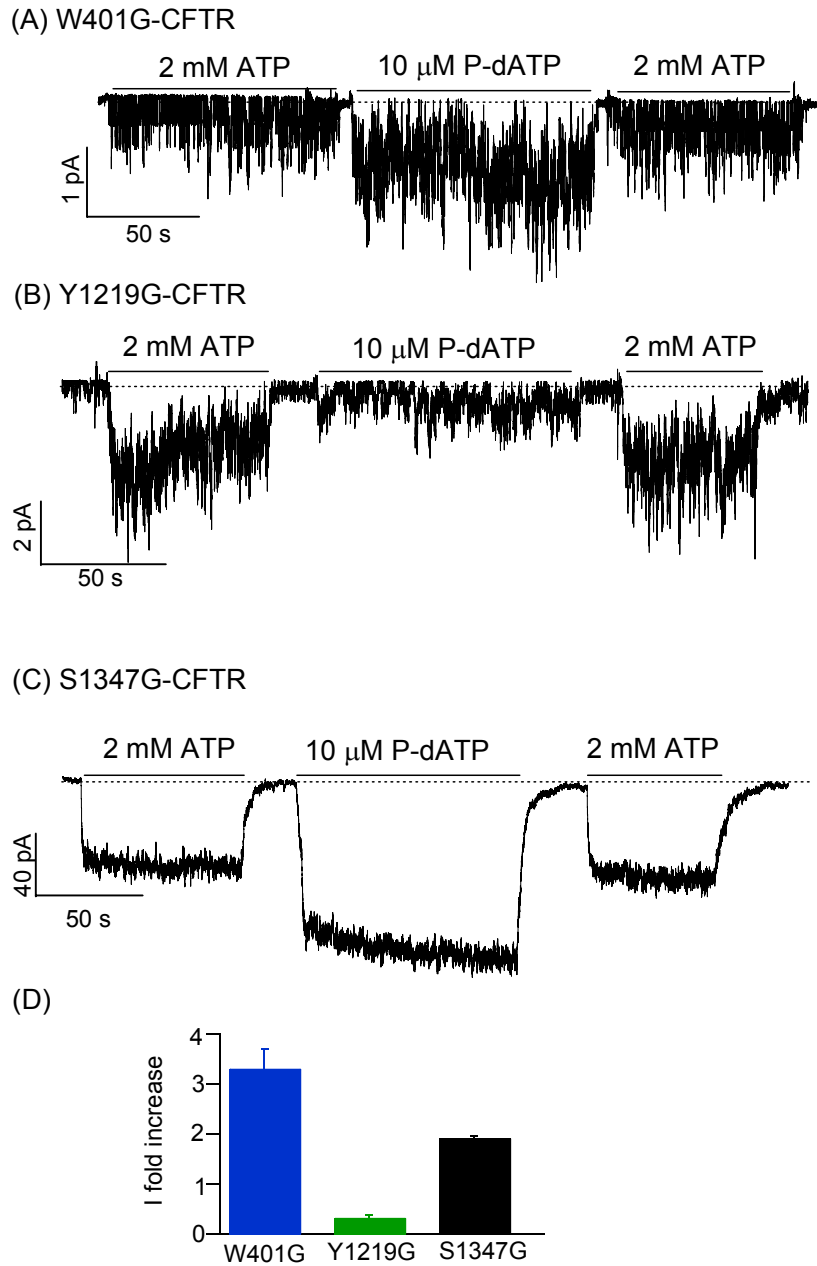

**Figure S2:** Effect of 10  $\mu$ M P-dATP on several CFTR mutants: (A) W401G-CFTR, (B) Y1219G-CFTR and (C) S1347G-CFTR. Excised patches were activated with 2 mM ATP + PKA (not shown). (D) Summary of the current fold increase for the different mutants. The P-dATP currents were normalized to the currents in the presence of 2 mM ATP.
